1 **Fungi with history: Unveiling the mycobiota of historic documents of Costa Rica**

2

3 Efraín Escudero-Leyva<sup>1,2</sup>, Sofía Vieto<sup>1</sup>, Roberto Avendaño<sup>1</sup>, Diego Rojas-Gätjens<sup>1</sup>, Paola

4 Agüero<sup>3</sup>, Carlos Pacheco<sup>4</sup>, Mavis L. Montero<sup>3,5</sup>, Priscila Chaverri<sup>2,6\*</sup> & Max Chavarría<sup>1,2,3\*</sup>

5

6 <sup>1</sup>Centro Nacional de Innovaciones Biotecnológicas (CENIBiot), CeNAT-CONARE, 1174-1200

7 San José, Costa Rica. <sup>2</sup>Centro de Investigaciones en Productos Naturales (CIPRONA),

8 Universidad de Costa Rica, 11501-2060 San José, Costa Rica. <sup>3</sup>Escuela de Química, Universidad

9 de Costa Rica, 11501-2060 San José, Costa Rica. <sup>4</sup>Archivo Nacional de Costa Rica, San José,

10 Costa Rica. <sup>5</sup>Centro de Investigación en Ciencia e Ingeniería de Materiales (CICIMA),

11 Universidad de Costa Rica, 2060 San Pedro, San José, Costa Rica. <sup>6</sup>Escuela de Biología,

12 Universidad de Costa Rica, 11501-2060 San José, Costa Rica.

13

14

15 

---

**\*Corresponding authors:**

16 Priscila Chaverri ([priscila.chaverriechandi@ucr.ac.cr](mailto:priscila.chaverriechandi@ucr.ac.cr))

17 Escuela de Biología and Centro de Investigaciones en Productos Naturales, Universidad de Costa

18 Rica, 11501-2060 San José, Costa Rica.

19 Max Chavarría ([max.chavarria@ucr.ac.cr](mailto:max.chavarria@ucr.ac.cr))

20 Escuela de Química and Centro de Investigaciones en Productos Naturales, Universidad de Costa

21 Rica, 11501-2060 San José, Costa Rica.

22

23

24 **Abstract**

25

26 Through nondestructive techniques, we studied the physicochemical characteristics and mycobiota  
27 of five key historic documents from Costa Rica, including the Independence Act of Costa Rica  
28 from 1821. We determined that for documents dated between 1500 and 1900 (i.e., the Cloudy Days  
29 Act, the Independence Act, and two documents from the Guatemalan Series from 1539 and 1549),  
30 the paper composition was cotton, whereas the 1991 replicate of the Political Constitution from  
31 1949 was made of wood cellulose with an increased lignin content. We also determined that the  
32 ink employed in 1821 documents is ferrogallic, i.e., formed by iron sulfate salts in combination  
33 with gallic and tannic acids. In total, 22 fungal isolates were obtained: 15 from the wood-cellulose-  
34 based Political Constitution and seven from the other three cotton-based documents. These results  
35 suggest that cotton-based paper is the most resistant to microbial colonization. Molecular  
36 identifications using three DNA markers (i.e., ITS nrDNA, beta-tubulin, and translation elongation  
37 factor 1-alpha) classified the isolates in eight orders and ten genera. The most frequent genera were  
38 *Cladosporium*, *Penicillium*, and *Purpureocillium*. Of the isolates, 95% presented cellulolytic  
39 activity correlated to their ability to cause deterioration of the paper. This work increases the  
40 knowledge of the fungal diversity that inhabits historic documents and its relationship with paper  
41 composition and provides valuable information to develop strategies to conserve and restore these  
42 invaluable documents.

43

44 **Keywords**

45 Biodeterioration; historic documents of Costa Rica, Independence Act of Costa Rica,  
46 *Cladosporium*, *Penicillium*, *Purpureocillium*, cellulolytic activity.

## 47 **Introduction**

48

49           Because biodeterioration can lead to the damage of historic documents, artwork,  
50 monuments, or buildings, its study is fundamental for the conservation of cultural heritage  
51 (Sterflinger and Pinar 2012; Palla and Barresi 2017; Vieto *et al.* 2021; Ranalli and Zanardini 2021;  
52 Ranalli *et al.* 2005). The prevention of biodeterioration and development of adequate conservation  
53 and restoration strategies cannot be an unscripted process; it is necessary to undertake diagnoses  
54 of these valuable pieces of our history and art, which include chemical characterization and the  
55 study of microbial diversity together with the physiological characteristics of biodeteriogens (Palla  
56 and Barresi 2017; Negi and Sarethy 2019).

57           Valuable cultural and historic objects, such as relevant paintings, ancient sculptures, and  
58 historic documents, can be seen as substrates on which microorganisms can thrive and cause  
59 damage. Specifically, paper-based documents contain biodegradable organic constituents that  
60 fungi can use as a substrate (Jia *et al.* 2020; Pyzik *et al.* 2021). The term “paper” is a general  
61 concept that encompasses all thinly laminated material that is produced with vegetable fiber pulp  
62 or other materials ground and mixed with water, dried, and hardened. Historically, vegetable fibers  
63 have been extracted from natural sources, such as straw, silk, hemp, flax, cotton, and the bark of  
64 different trees, among others. The content of cellulose and other components of paper can vary  
65 depending on its origin, generating papers that are more or less resistant to biodegradation as a  
66 consequence. For example, it is well known that cellulose fibers have high purity in cotton and  
67 linen papers, which results in papers with greater durability and resistance to biodeterioration  
68 (Negulescu *et al.* 1998; Daria *et al.* 2020).

69           Damage produced by fungi that is normally present on paper—including staining,  
70 material weakening, and partial or complete destruction of documents— can occur in the long term  
71 (Sequeira *et al.* 2019). Besides the alterations caused to the documents, the health of curators and  
72 people involved in archives or museums can also be threatened if the spore production is elevated  
73 or mycotoxins are produced (Sterflinger and Pinzari 2012). The study of fungi responsible for the  
74 biodegradation of paper began in 1818 with the pioneering work of Christian Gottfried Ehrenberg  
75 (Sterflinger and Pinzari 2012). To date, diverse fungi have been identified in old paperwork, such  
76 as *Aspergillus*, *Chaetomium*, *Cladosporium*, *Penicillium*, and *Trichoderma*; occasionally, new  
77 species can even be found (Coronado-Ruiz *et al.* 2018; Sequeira *et al.* 2019). Mesquita *et al.* (2009)  
78 isolated, identified, and characterized the microbiota from historic documents dated between  
79 1860–1939 in the archive of the University of Coimbra and found fourteen fungal genera, of which  
80 *Aspergillus*, *Cladosporium*, and *Penicillium* were the most common. Our research group recently  
81 isolated nineteen fungi from a nineteenth-century French collection of drawings and lithographs  
82 in the custody of Universidad de Costa Rica (Coronado-Ruiz *et al.* 2018). The fungi were  
83 molecularly identified as *Arthrimum*, *Aspergillus*, *Chaetomium*, *Cladosporium*, *Colletotrichum*,  
84 *Penicillium*, and *Trichoderma*; a great majority of them showed cellulolytic activity. Many fungal  
85 species found in historic paper-based documents contain enzymatic activity related to  
86 biodeterioration, which allows fungi to use these surfaces as a source of carbon (Coronado-Ruiz  
87 *et al.* 2018; Pinheiro *et al.* 2019; Vieto *et al.* 2022). The enzymatic machinery to take advantage  
88 of paper as a source of carbon has been reported in fungi isolated from historic documents and  
89 includes the presence of exoenzymes with cellulase activity (Puškárová *et al.* 2019; El Begardi *et*  
90 *al.* 2014), lignocellulolytic (Mazzoli *et al.* 2018) glucanase, and laccase (Sterflinger and Pinzari  
91 2012).

92           The National Archive of Costa Rica (NACR) —called Archivos Nacionales (National  
93 Archives) before 1948—is where the most treasured documents in Costa Rica are preserved; these  
94 include the Cloudy Days Act (Acta de los Nublados, September 28, 1821), in which authorities of  
95 the Municipality of León, in the Captaincy General of Guatemala, expressed their position on  
96 Central American Independence; the Political Constitution with all historic changes, including the  
97 abolition of the Costa Rican army (Jaén García 2019; Chacón León 2021); and perhaps the most  
98 important historic document in the country: the Costa Rican Independence Act (Acta de  
99 Independencia, October 29, 1821). These invaluable documents are in addition to more than  
100 20,000 linear meters of other paper-based documents that contain the history of Costa Rica and  
101 that are in the custody of NACR. Due to the tropical peculiarities of the country—such as high  
102 humidity, heat, long rainy seasons, and sometimes inadequate storage conditions—documents and  
103 artworks are constantly threatened and come under continuous biodeterioration, making the  
104 conservation of the country’s cultural heritage a challenge (Silva, 2011).

105           The aim of this work was to characterize the paper composition and evaluate the presence  
106 and cellulolytic activity of culturable fungi in historic documents from the National Archive of  
107 Costa Rica, including invaluable documents such as the Independence Act of Costa Rica. This  
108 information enables restorers to establish guidelines for the preservation and restoration of paper-  
109 based historic documents.

110

## 111 **Materials and Methods**

112

### 113 *Sampling of documents*

114

115 Permits to sample the historic documents were obtained from the Institutional Commission  
116 of Biodiversity of the University of Costa Rica (resolution N° 186) and authorities of the NACR.  
117 Historic documents stored at NACR were sampled between March and September 2019. The  
118 documents were: (i) Political Constitution redacted in 1949 (1991 replicate), (ii) Cloudy Days Act  
119 from 1821 (Acta de los Nublados), (iii) Independence Act of Costa Rica from 1821, and (iv) two  
120 documents from the Guatemalan Series from 1539 and 1549 (Fig. 1). For fungal isolation, careful  
121 rubbing with sterile cotton swabs over the surface of the documents was performed, especially  
122 seeking signs of biodeterioration such as dark spots. The swabs were then saved inside Falcon  
123 tubes for transport to the laboratory.

124

125 *Material characterization by attenuated-total-reflection Fourier-transform infrared spectra (ATR-*  
126 *FTIR).*

127

128 ATR-FTIR was used to determine functional groups and distinguish cellulosic materials.  
129 These ATR-FTIR spectra were recorded using a portable spectrophotometer (Bruker Alpha II,  
130 Canada) with platinum ATR mode and monolithic diamond crystal. The spectral resolution was 4  
131  $\text{cm}^{-1}$ , in wavenumber range 400–4,000  $\text{cm}^{-1}$  with 99 scans. To carry out the identification, the  
132 “Database of ATR-FT-IR spectra of various materials” (Vahur *et al.* 2016) was used.

133

134 *Material characterization by X-ray fluorescence (XRF).*

135

136 X-ray fluorescence (XRF) was used to determine the elemental composition of the  
137 material, especially the presence of metallic ions, such as iron and calcium, among others. This

138 technique is especially important in the characterization of inks. The XRF spectra were recorded  
139 with a portable XRF spectrophotometer (Elio, XGLab; Bruker, Italy) measured at the  $K\alpha$  line of  
140 manganese (resolution 140 eV), a SDD detector (active area 25 mm<sup>2</sup>, fluorescence angle 63°,  
141 incident angle 90°) and a distance of 14 mm from the detector to the sample. The electric current  
142 was adjusted to 80  $\mu$ A, with a voltage of 50 kV and a measuring duration of 300 s. Software XRS-  
143 FP2 (CrossRoads Scientific, USA) was used for data analysis, maintaining a noise signal of 0.5.

144

#### 145 *Fungal cultivation strategy*

146

147 Samples were processed in the laboratory 2-4 hours after sampling. Cotton swabs were  
148 immersed into sterile phosphate-buffered saline solution (PBS; 400  $\mu$ L, 1X; Thermo Fisher  
149 Scientific, USA) and homogenized using a vortex (40 s). Each sample (100  $\mu$ L) was then cultured  
150 in plates of potato dextrose agar (1% Difco PDA; BD company, France) and carboxymethyl  
151 cellulose (1% CMC; Sigma Aldrich, USA, with 0.8 % agar; BD company, France) with kanamycin  
152 (50  $\mu$ g/mL; Sigma-Aldrich, USA) and incubated (25 °C) until growth was observed. Colonies  
153 exhibiting varied morphologies were purified and transferred onto PDA plates; photographs were  
154 taken after incubation (15 days, 30 °C).

155

#### 156 *Molecular identification of the isolated fungi*

157

158 Genomic DNA was extracted from the isolated fungi using the method described by Lodhi  
159 *et al.* (1994) with modifications. First, two agar disks (diameter 8 mm) from each fungus were  
160 added to a centrifuge tube (2 mL) and were ground with sterile micro-pestles. Extraction buffer

161 (750  $\mu$ L, sodium EDTA 20 mM, tris-HCl 100 mM, NaCl 1.4 M, CTAB 2 % [w/v], PVP 2% [w/v]  
162 and  $\beta$ -mercaptoethanol 0.2%) was added; the tubes were vortexed and incubated (20 min, 65  $^{\circ}$ C).  
163 For DNA separation, trichloromethane-octanol (750  $\mu$ L, 24:1) was added to the mixture and  
164 centrifuged (25  $^{\circ}$ C, 14,000 rpm). DNA from the top aqueous phase (600  $\mu$ L) was precipitated on  
165 an addition of 2-propanol (600  $\mu$ L; Sigma-Aldrich, USA). Then, ethanol (70 %, 500  $\mu$ L; Sigma-  
166 Aldrich, USA) was used to wash the precipitated DNA. Finally, DNA was resuspended in Tris-  
167 EDTA buffer (50  $\mu$ L) with RNase (1  $\mu$ L, 10 mg/mL; Thermo Fisher Scientific, USA).

168 To obtain a preliminary identification of the isolates, the nrDNA internal transcribed  
169 spacers (ITS) were amplified with primers ITS4 (TCCTCCGCTTATTGATATGC) and ITS5  
170 (GGAAGTAAAAGTCGTAACAAGG) (White *et al.* 1990). Depending on the results from ITS,  
171 secondary markers were used to refine the identifications for some isolates, i.e., portions of the  
172 translation elongation factor 1-alpha (TEF1; primers CATCGAGAAGTTCGAGAAGG and  
173 TACTTGAAGGAACCCTTACC) (Carbone and Kohn 1999) and beta-tubulin (TUB2; primers  
174 AACATGCGTGAGATTGTAAGT and TAGTGACCCTTGCCAGTTG) (O'Donnell and  
175 Cigelnik 1997) genes. Each reaction (total volume 20  $\mu$ L) consisted of Master Mix (10  $\mu$ L, 2X;  
176 Thermo Fisher Scientific, USA), bovine serum albumin (BSA, 0.5  $\mu$ L, 20 mg/mL; Sigma Aldrich,  
177 USA), dimethyl sulfoxide (DMSO, 1.5  $\mu$ L; Sigma Aldrich, USA), and primers (0.5  $\mu$ L each, 10  
178  $\mu$ M) and DNA (2  $\mu$ L, 50 ng/ $\mu$ L). PCR reactions were implemented in a thermal cycler (9902  
179 Veriti, Applied Biosystem, Norwalk, USA), according to conditions described by Schoch *et al.*  
180 (2012) for ITS, Carbone and Kohn (1999) for TEF1 and O'Donnell and Cigelnik (1997) for TUB2.  
181 Sanger sequencing of PCR products was performed with Psomagen (USA); the raw sequences  
182 were edited and assembled in Bioedit v.7.2. Isolate identification was performed by comparing the  
183 consensus sequences against the GenBank database using the BLAST search tool. Then, a



184 cladogram was constructed using the ITS sequences. For this, the two closest matches, with type  
185 material prioritized, were retrieved/downloaded from the BLAST analysis and aligned using  
186 MUSCLE (Edgar 2004). The resulting alignment in Phylip format was submitted to Bayesian  
187 Inference analysis with Exabayes (Aberer *et al.* 2014). MCMC was run in parallel and 15 million  
188 generations were done with 25% burn-in. All analyses were run in the Kabré supercomputer  
189 (CNCA-CONARE, Costa Rica). A consensus tree was visualized and edited with FigTree v.1.4.3  
190 (Rambaut 2010). Newly generated sequences were deposited in GenBank under accession  
191 numbers ON479855-ON479876 (ITS), ON720280-ON720285 (TEF1), and ON734081–  
192 ON734096 (TUB2).

193

#### 194 *Screening of cellulolytic activity*

195

196 The screening of cellulase-producing fungi was undertaken on carboxymethyl  
197 cellulose plates (CMC, 1 %; Sigma Aldrich, USA) as the sole carbon source, supplemented with  
198 agar (0.8 %, Sigma Aldrich, USA; Johnsen and Krause 2014; Gohel *et al.* 2014). For this purpose,  
199 agar disks (diameter ~0.8 mm) of each fungus were placed in the center of CMC plates and  
200 incubated (7 days, 30 °C). After incubation, each plate was flooded with Gram's iodine stain (10  
201 mL; Sigma-Aldrich, USA; Kasana *et al.* 2008; Gohel *et al.* 2014) and washed with water for 10  
202 min. Because Gram's iodine dye is held only by integral cellulose polymers, cellulase activity is  
203 revealed by the clear zones appearing as pale halos (Florencio *et al.* 2012). Photographs were taken  
204 before and after staining the plates; software ImageJ v.1.52k (Bourne 2010) was used to measure  
205 fungal growth (as the diameter of the colony) and the halo diameter for a subsequent calculation

206 of the enzymatic index (EI), a semiquantitative estimate of enzyme activity according to the  
207 following formula (Florencio *et al.* 2012):

208

$$209 \quad EI = \frac{\text{Diameter of hydrolysis zone}}{\text{Diameter of colony}}$$

210

211 The experiments were performed in triplicate; *Pleurotus ostreatus* served as a positive control  
212 (Garzillo *et al.* 1994; Valášková and Baldrian 2006).

213

## 214 **Results**

215

216 *Material characterization by infrared spectra (ATR-FTIR) and X-ray fluorescence (XRF)*

217

218 Macroscopically all documents analyzed showed detailed damage as observed in Fig. 1, in  
219 which signs of humidity and possible leakage are visible in several areas. Particularly, in the  
220 Independence Act surface, orangish spots were present. When observed under UV light, those  
221 areas are fluorescent and appear as dark spots in UV reflectance photographs (Supplementary Fig.  
222 S1).

223 The chemical composition of historic documents (both inks and paper) was studied through  
224 nondestructive and portable techniques (See Materials and Methods). The composition of each  
225 document is shown in Table 1. The composition of the organic substrate was determined by  
226 comparing the IR spectra with databases; the elements present in the ink and additives were  
227 resolved with X-ray fluorescence. The results showed that the paper in the documents from 1500–  
228 1900 was handmade mainly from cotton with watermark presence (excepting the second page from

229 the Cloudy Days Act, which was cellulose-based). In the Political Constitution (1991 replicate),  
230 modern paper was used, characterized by shorter fibers and greater lignin content; this indicates  
231 that this paper was made from wood cellulose. The results showed that the ink employed in the  
232 documents from 1821 was ferrogallic, formed by iron sulfate salts in combination with gallic and  
233 tannic acids (Table 1 and Supplementary Fig. S1).

234

### 235 *Isolation and identification of fungi*

236

237 In total, 22 fungal isolates (Supplementary Fig. S2) were recovered from the Costa Rican  
238 historic documents, being the Political Constitution (1991 replicate) that with the most isolates (15  
239 in total). The taxonomic identification provided by BLAST and ITS phylogenetic analyses are  
240 shown in Table 2 and Fig. 2, respectively. The fungi recovered belong to 14 genera and eight  
241 orders. Two taxa were obtained from the Independence Act, two from the Cloudy Days Act, two  
242 from the document from 1549, and only one fungal isolate from the oldest document (Guatemalan  
243 Series 1539). The phylogenetic placement of the isolates corresponded to eight orders, as shown  
244 in the ITS cladogram (Fig. 2). The phylogenetic analysis supports the identifications performed  
245 with the BLAST tool, at least at the genus level. TEF1 and TUB2 sequences refined the  
246 identification for some of the isolates (Table 2).

247 Most of the fungi found belong in the Ascomycota (86%), followed by Basidiomycota  
248 (14%). Among the resulting orders, the majority belong in Hypocreales (23%; *Acremonium*,  
249 *Beauveria*, and *Purpureocillium*), Eurotiales (18%; *Aspergillus* and *Penicillium*), and Capnodiales  
250 (18%; *Cladosporium*). The Basidiomycota was represented by *Coprinellus*, *Trametes* and an  
251 unidentified species of Psathyrellaceae.

252

253 *Cellulolytic activity*

254

255           The results from cellulolytic activity are shown in Table 3. For the 22 isolates tested, the  
256 Enzymatic Index (EI) average was 2.45, with *Cyphellophora* aff. *pluriseptata* CP2-A4P isolated  
257 from the Political Constitution being the fungus with the greatest cellulolytic activity ( $4.0 \pm 0.3$ ),  
258 followed by *Penicillium steckii* ND1-A1P ( $3.3 \pm 0.3$ ), and *Cladosporium* sp. CP1-A2P ( $3.3 \pm 0.1$ ).  
259 In contrast, *Purpureocillium lilacinum* 1539-A1P —from the 1539 Guatemalan Series— was the  
260 only isolate without cellulolytic activity. The other fungal isolates showed cellulolytic activity  
261 above the levels of the control (*Pleurotus ostreatus*), except for *Trametes* CP1-A3C.

262

## 263 **Discussion**

264

265           In this work we determined the chemical and microbiological composition of five  
266 important historic documents of Costa Rica, including the Independence Act of 1821. Through  
267 spectral techniques, we determined that for the documents dated between 1500 and 1900 (i.e., the  
268 Cloudy Days Act, the Independence Act of Costa Rica of 1821, and two documents from the  
269 Guatemalan Series of 1539 and 1549), the composition of the paper was cotton (i.e., approximately  
270 90% cellulose (Felgueiras *et al.* 2021), except the second page of the Cloudy Days Act, which is  
271 composed of cellulose acetate. The 1991 replicate of the Political Constitution of 1949 was made  
272 of cellulose and lignin; this paper presented the greatest amount of lignin, which indicates a modern  
273 paper made from wood (hereafter referred to as wood cellulose-based paper).

274           Despite that modern paper is relatively stable, deterioration is common with increased  
275 levels of humidity and acidification produced by oxidation and the presence of microorganisms  
276 (Proniewicz *et al.* 2001). Although the 1991 replicate of the Political Constitution from 1949 is  
277 the most recent, 15 fungal isolates were obtained, whereas from all the oldest documents (made  
278 mainly of cotton), seven in total were obtained. These data suggest that wood-cellulose-based  
279 paper possesses characteristics that are more suitable for fungal colonization than cotton-based  
280 documents. These observations make sense if we consider the differences between the chemical  
281 composition of cotton and paper obtained from other plant fibers such as wood. Cotton contains  
282 approximately 90% cellulose (hence it is sometimes referred to as highly pure cellulose), whereas  
283 other natural fibers, such as wood, contain 40–55% cellulose combined with other constituents  
284 such as lignin and hemicelluloses (Felgueiras *et al.* 2021). Cellulose is considered a two-phase  
285 material, having both crystalline and amorphous phases (Ling *et al.* 2019). Cotton cellulose fibers  
286 are reported to have a greater degree of polymerization and crystallinity, which generates stronger  
287 fibers and greater resistance to hydrolysis and biodegradation. (Itävaara *et al.* 1999). Therefore,  
288 these two characteristics (higher cellulose content and higher crystallinity) make cotton a substrate  
289 that is less prone to microbial colonization than a material such as wood-based paper, which is the  
290 case of the paper of the 1991 replicate of the Political Constitution of 1949. Enzymatically, the  
291 reduced ability for microbial colonization of cotton-based papers is related to the more limited  
292 access of the cellulase enzyme complex to the substrate due to the orderly and compact architecture  
293 of the crystalline cellulose present in cotton (Arantes and Saddler 2010).

294           In Fig. 1C, the orangish spots over the Independence Act surface indicate oxidation from  
295 cellulose and iron, probably caused by both abiotic and biotic factors (Choi 2007). Those areas are  
296 fluorescent under UV light and appear as dark spots in UV reflectance photographs

297 (Supplementary Fig. S1). Although excessive humidity can itself trigger oxidation, contributing to  
298 the damage of important documents, the inks used can also be affected by this abiotic factor,  
299 producing the migration of metal ions of common ink components such as iron and copper,  
300 compromising the preservation of historic and cultural heritage due to weakened paper (Henniges  
301 *et al.* 2006). Our work determined that the ink employed in the documents from 1821 was  
302 ferrogallic, formed by iron sulfate salts in combination with gallic and tannic acids. The last was  
303 confirmed from the XRF and multispectral photography (see Supplementary Fig. S1). Ink of this  
304 kind is visible under infrared and, in darkness, under UV light (Havermans *et al.* 2003). The  
305 implementation of optical spectroscopy techniques, such as those used in this work, have been  
306 shown to help identify the early stages of document damage by microorganisms such as fungi,  
307 relating changes in the spectral composition to the active presence of fungi (Povolotckaia *et al.*  
308 2019).

309 In the historic documents, we obtained a total of 22 fungi belonging to 14 genera, of which  
310 five (35%) were previously identified in paper-based historic documents (Bensch *et al.* 2018;  
311 Pinheiro *et al.* 2019; Romero *et al.* 2021; Trovão and Portugal 2021). The presence of two  
312 Chaetothyriales members (isolates 1549-4A1C and CP2-A4P) is interesting because they are  
313 inhabitants of environments with limited resources, such as rocks, insects, and ant nests; some  
314 species in the order can even become pathogenic for humans, especially in tropical regions (Attili-  
315 Angelis *et al.* 2014; Ahmed *et al.* 2021). *Cyphellophora*, also Chaetothyriales, is closely related to  
316 *Phialophora* (Feng *et al.* 2014), which includes species that grow in extremely acidic conditions  
317 and have been reported to produce  $\beta$ -mannanase and  $\beta$ -glucanase enzymes (Zhao *et al.* 2010; Zhao  
318 *et al.* 2012). Our isolate CP2-A4P had the greatest enzymatic index value ( $4.0 \pm 0.3$ ), for which  
319 further analysis involving enzyme identification could yield intriguing results. Isolate *Penicillium*

320 *steckii* ND1-A1P originated from a cotton-based substrate and presented an enzymatic index of  
321  $3.3 \pm 0.3$ . This corresponds to what is commonly observed because *Aspergillus* and *Penicillium*  
322 species are registered continuously in paper biodeterioration and are known to break the hydrogen  
323 bonds, which translates into a weakening of the documents, regardless of their composition  
324 (Povolotckaia *et al.* 2019). In total, three isolates corresponding to *Penicillium* were obtained from  
325 the Cloudy Days Act, the Political Constitution, and the 1549 Guatemalan Series. We registered  
326 only a single isolate corresponding to *Aspergillus hiratsukae* (AI3-A1P), which was recovered  
327 from the Independence Act of 1821. This was unexpected because *Aspergillus* spp. are frequent  
328 biodeteriogens in cultural heritage objects and spaces in which historic documents are preserved,  
329 such as the National Archive of Cuba, in which *Aspergillus*, *Cladosporium*, and *Penicillium* were  
330 the most frequent airborne genera reported (Borrego and Perdomo 2016). In this work,  
331 *Cladosporium* isolates were present in the Cloudy Days Act (isolate ND2-A1P), the Independence  
332 Act (isolate AI1-A1C), and the Political Constitution (isolates CP1-A1P and CP1-A2P),  
333 corresponding to cellulose acetate, cotton, and wood cellulose substrates. *Cladosporium* spp. are  
334 reported as colonizers in agricultural waste (Herculano *et al.* 2011), artworks (Coronado-Ruiz *et*  
335 *al.* 2018), repositories of historic documents (Borrego and Perdomo 2016), and as extremophiles  
336 in high-altitude tropical glaciers (Calvillo-Medina *et al.* 2020).

337 *Neopestalotiopsis clavispota* (CP1-A2C) and *Pestalotiopsis kenyana* (CP2-A2C)  
338 (Xylariales), both obtained from the Political Constitution, belong to a genus known as a common  
339 endophyte, saprotroph, and phytopathogen in diverse plants and climates (Reddy *et al.* 2016).  
340 Because of the various ecological relationships this genus has with plants, it has attracted attention  
341 for its cellulolytic abilities, with over 400 possible enzymes found through the study of a  
342 *Pestalotiopsis* isolated from a mangrove (Arfi *et al.* 2013). So far, there are some cellulolytic

343 enzymes known from this genus that have been studied, such as the xylanase (Koh *et al.* 2021) or  
344 the cellulases (Goukanapalle *et al.* 2020). Another single isolate obtained from the Political  
345 Constitution was *Periconia* CP1-A1C, which belongs to the dark septate fungi Pleosporales, with  
346 some isolates reported with thermostable  $\beta$ -Glucosidases suitable for biotechnological processes  
347 (Harnpicharnchai *et al.* 2009). *Periconia* species have been encountered in extreme environments,  
348 such as deserts, seas, tropical glaciers (Calvillo-Medina *et al.* 2020), and even a new species  
349 growing over lithographs from the 19th century (Coronado-Ruiz *et al.* 2018), among others.

350 Hypocreales isolates were only found in the Political Constitution. Intriguing were two  
351 isolates known as insect pathogens, i.e., *Beauveria* (CP2-A3P) and *Purpureocillium* (1539-A1P  
352 and CP2-A1P; Shrestha *et al.* 2019). The cellulolytic activity recorded for our *Beauveria* isolate  
353 was  $3.1 \pm 0.3$ , which is consistent with reports of cellulolytic activity driven by a thermally stable  
354  $\beta$ -Glucosidase in *Beauveria bassiana* (Borgi and Gargouri 2016). Screening for cellulolytic  
355 activity in this entomopathogenic species is not commonly done because it is mainly studied for  
356 its biological control abilities in multiple agricultural crops (Posada and Vega 2006; Sanjuan *et al.*  
357 2014; Mwamburi 2021). *Beauveria* has also been found as an endophyte, along with  
358 *Purpureocillium* (Kepler *et al.* 2013). An isolate of *Purpureocillium lilacinum* has been reported  
359 as a biodeteriogen of indoor materials able to grow in alkaline materials, producing damage in  
360 limestones and plasters of cultural heritage in Russia (Ponizovskaya *et al.* 2019). The tolerance to  
361 extreme conditions by some *Purpureocillium* spp. results in the ability to become pathogenic to  
362 humans and resistant to fungicides (Calvillo-Medina *et al.* 2020). Although one isolate recovered  
363 from the 1539 Guatemalan Series (cotton-based) was unable to grow in the carboxymethyl  
364 cellulose media, isolate CP2-A1P from the Political Constitution (wood cellulose-based) attained  
365 EI of 3.2. *Acremonium* isolates CP2-A3C and ND2-A1P registered enzymatic indexes  $< 3$ .



366 Previous researchers reported a xylanase produced by *Acremonium cellulolyticus* (Watanabe *et al.*  
367 2014); another group subsequently revised the taxonomy and concluded a misidentification of an  
368 *Acremonium* species, reidentifying isolate Y-94 from Japan as *Talaromyces* (Eurotiales) (Fujii *et*  
369 *al.* 2014). Apart from the latter, only a xylanase has been reported for *A. alcalophilum* (Šuchová  
370 *et al.* 2020).

371 Small enzymatic indexes also occurred for three basidiomycetes recovered from the  
372 Political Constitution (CP1-A3C, CP1-A3P, and CP2-A2P). These were identified as belonging to  
373 Psathyrellaceae, including *Coprinellus* (CP2-A2P). From these, only one report exists of a  
374 xylanase produced by *Coprinellus disseminatus*, which was tolerant to varied pH and temperatures  
375 (Agnihotri *et al.* 2010). Isolate *Trametes* CP1-A3C registered an EI less than the control (*Pleurotus*  
376 *ostreatus*). Species with tough fruiting bodies, such as *Trametes maxima*, are reported to possess  
377 laccase activity, even when exposed to herbicides (Cupul *et al.* 2014); an isolate of *T. versicolor*  
378 is reported to cause the effective degradation of fungicides (Rodríguez-Rodríguez *et al.* 2012).

379

## 380 **Conclusions**

381

382 Regardless of the material of a document of origin —cotton or wood cellulose— most  
383 recovered fungal isolates presented cellulolytic activity. From the historic documents sampled, the  
384 Political Constitution had the greatest number of isolates, which suggests that wood cellulose-  
385 based paper possesses characteristics more suitable for fungal colonization than the oldest cotton-  
386 based documents (i.e., documents from 1500–1900). Cotton contains 90% cellulose and has great  
387 crystallinity, which makes it more difficult for the enzymatic machinery of microorganisms to  
388 degrade these polymers and use them for their nutritional requirements. Even though the oldest

389 documents (e.g., Independence Act and the Cloudy Days Act) yielded few isolates, restoration and  
390 improvement of the conditions they are stored in should be implemented to avoid oxidation and  
391 weakening of their fibers which could then increase microbiological contamination. The results of  
392 our work provide valuable information for establishing the appropriate protocols to undertake that  
393 restoration and conservation. Determining the chemical composition of the paper and the  
394 composition of the inks, as well as the microbiological load, allows for identification of the most  
395 appropriate strategies and treatments to restore documents as important to Costa Rica as the Act  
396 of Independence itself. Because historic documents can be considered microhabitats with limited  
397 resources, the screening of species with novel biotechnological applications in such environments  
398 is a promising and fascinating field. The study of how best to conserve historic documents is vital  
399 to preserve, in a satisfactory condition, important sources and records of human history.  
400 Multidisciplinary approaches such as the present work can help curators make the best choice of  
401 restoration techniques and eventually fulfill the Korean phrase: “Silk can stand five hundred years,  
402 but paper can stand one thousand” (Jeong et al., 2014).

403

#### 404 **References**

405 Aberer, A.J., Kobert, K. and Stamatakis, A. (2014) ExaBayes: massively parallel Bayesian tree  
406 inference for the whole-genome era. *Mol Biol Evol* **31**, 2553–2556.

407

408 Agnihotri, S., Dutt, D., Tyagi, C.H., Kumar, A. and Upadhyaya, J.S. (2010) Production and  
409 biochemical characterization of a novel cellulase-poor alkali-thermo-tolerant xylanase from  
410 *Coprinellus disseminatus* SW-1 NTCC 1165. *World J Microbiol Biotechnol* **26**, 1349–1359.

411

412 Ahmed, S.A., Bonifaz, A., González, G.M., Moreno, L.F., Menezes da Silva, N., Vicente, V.A.,  
413 Li, R. and de Hoog, S. (2021) Chromoblastomycosis caused by *Phialophora*-proven cases from  
414 Mexico. *J Fungi* **7**, e95.

415

416 Arantes, V. and Saddler, J.N. (2010) Access to cellulose limits the efficiency of enzymatic  
417 hydrolysis: the role of amorphogenesis. *Biotechnol Biofuels* **3**, e4.

418

419 Arfi, Y., Chevret, D., Henrissat, B., Berrin, J.G., Levasseur, A. and Record, E. (2013)  
420 Characterization of salt-adapted secreted lignocellulolytic enzymes from the mangrove fungus  
421 *Pestalotiopsis* sp. *Nat Commun* **4**, 1810–1819.

422

423 Attili-Angelis, D., Duarte, A.P.M., Pagnocca, F.C., Nagamoto, N.S., De Vries, M., Stielow, J.B.  
424 and De Hoog, G.S. (2014) Novel *Phialophora* species from leaf-cutting ants (tribe Attini). *Fungal*  
425 *Divers* **65**, 65–75.

426

427 Bensch, K., Groenewald, J. Z., Meijer, M., Dijksterhuis, J., Jurjević, Ž., Andersen, B., Houbraken,  
428 J., Crous, P.W. and Samson, R.A. (2018) *Cladosporium* species in indoor environments. *Stud*  
429 *Mycol* **89**, 177–301.

430

431 Borgi, I. and Gargouri, A. (2016) A novel high molecular weight thermo-acidoactive  $\beta$ -glucosidase  
432 from *Beauveria bassiana*. *Appl Biochem Microbiol* **52**, 602–607.

433

434 Borrego, S. and Perdomo, I. (2016) Airborne microorganisms cultivable on naturally ventilated  
435 document repositories of the National Archive of Cuba. *Environ Sci Pollut Res*, **23**, 3747–3757.

436

437 Bourne, R. (2010). ImageJ. In: Fundamentals of digital imaging in medicine. Springer, London.

438

439 Calvillo-Medina, R.P., Gunde-Cimerman, N., Escudero-Leyva, E., Barba-Escoto, L., Fernández-  
440 Tellez, E.I., Medina-Tellez, A.A., Bautista-de Lucio, V., Ramos-López, M.Á., and Campos-  
441 Guillén, J. (2020) Richness and metallo-tolerance of cultivable fungi recovered from three high  
442 altitude glaciers from Citlaltépetl and Iztaccíhuatl volcanoes (Mexico). *Extremophiles* **24**, 625–  
443 636.

444

- 445 Carbone, I. and Kohn, L.M. (1999) A method for designing primer sets for speciation studies in  
446 filamentous ascomycetes. *Mycologia* **91**, 553-556.  
447
- 448 Chacón León, L.A. (2021) El bicentenario de la independencia de Costa Rica. *Revista del Archivo*  
449 *Nacional de Costa Rica* **85**, 1–13.  
450
- 451 Choi, S. (2007) Foxing on paper: a literature review. *J Am Inst Conserv* **46**, 137-152.  
452
- 453 Coronado-Ruiz, C., Avendaño, R., Escudero-Leyva, E., Conejo-Barboza, G., Chaverri, P. and  
454 Chavarría, M. (2018) Two new cellulolytic fungal species isolated from a 19th-century art  
455 collection. *Sci Rep* **10**, e7492.  
456
- 457 Cupul, W.C., Abarca, G.H., Vázquez, R.R., Salmenes, D., Hernández, R.G. and Gutiérrez, E.A.  
458 (2014) Response of ligninolytic macrofungi to the herbicide atrazine: dose-response bioassays.  
459 *Revista Argentina de Microbiología* **46**, 348–357.  
460
- 461 Daria, M., Krzysztof, L. and Jakub, M. (2020) Characteristics of biodegradable textiles used in  
462 environmental engineering: A comprehensive review. *J Clean Prod* **268**, e122129.  
463
- 464 Edgar, R.C. (2004) MUSCLE: a multiple sequence alignment method with reduced time and space  
465 complexity. *BMC Bioinform* **5**, 1-19.  
466
- 467 El Bergadi, F., Laachari, F., Elabed, S., Mohammed, I.H. and Ibsouda, S.K. (2014) Cellulolytic  
468 potential and filter paper activity of fungi isolated from ancient manuscripts from the Medina of  
469 Fez. *Ann Microbiol* **64**, 815–822.  
470
- 471 Felgueiras, C., Azoia, N.G., Gonçalves, C., Gama, M. and Dourado, F. (2021) Trends on the  
472 cellulose-based textiles: raw materials and technologies. *Front Bioeng Biotechnol* **9**, 608826.  
473

- 474 Feng, P., Lu, Q., Najafzadeh, M.J., van den Ende, A.H.G.G., Sun, J., Li, R., Xi, L., Vicente, V.A.,  
475 Lai, W., Lu, C. and de Hoog, G.S. (2014) *Cyphellophora* and its relatives in *Phialophora*:  
476 biodiversity and possible role in human infection. *Fungal Divers* **65**, 17–45.  
477
- 478 Florencio, C., Couri, S. and Farinas, C.S. (2012) Correlation between agar plate screening and  
479 solid-state fermentation for the prediction of cellulase production by *Trichoderma* strains. *Enzyme*  
480 *Res* **2012**, e793708.  
481
- 482 Fujii, T., Hoshino, T., Inoue, H. and Yano, S. (2014) Taxonomic revision of the cellulose-  
483 degrading fungus *Acremonium cellulolyticus* nomen nudum to *Talaromyces* based on phylogenetic  
484 analysis. *FEMS Microbiol Lett* **351**, 32–41.  
485
- 486 Garzillo, A.M.V., Di Paolo, S., Ruzzi, M. and Buonocore, V. (1994) Hydrolytic properties of  
487 extracellular cellulases from *Pleurotus ostreatus*. *Appl Microbiol Biotechnol* **42**, 476–481.  
488
- 489 Gohel, H.R., Contractor, C.N., Ghosh, S. K. and Braganza, V.J. (2014) A comparative study of  
490 various staining techniques for determination of extra cellular cellulase activity on Carboxy  
491 Methyl Cellulose (CMC) agar plates. *Int J Curr Microbiol Appl Sci* **3**, 261–266.  
492
- 493 Goukanapalle, P.K.R., Kanderi, D.K., Rajoji, G., Shanthi Kumari, B.S. and Bontha, R.R. (2020)  
494 Optimization of cellulase production by a novel endophytic fungus *Pestalotiopsis microspora*  
495 TKBRR isolated from Thalakona forest. *Cellulose* **27**, 6299–6316.  
496
- 497 Harnpicharnchai, P., Champreda, V., Sornlake, W. and Eurwilaichitr, L. (2009) A thermotolerant  
498  $\beta$ -glucosidase isolated from an endophytic fungi, *Periconia* sp., with a possible use for biomass  
499 conversion to sugars. *Protein Expr Purif* **67**, 61–69.  
500
- 501 Havermans, J., Aziz, H.A. and Scholten, H. (2003) Non destructive detection of iron gall inks by  
502 means of multispectral imaging part 1: Development of the detection system. *Restaurator* **24**, 55-  
503 60.  
504

505 Henniges, U., Prohaska, T., Banik, G. and Potthast, A. (2006) A fluorescence labeling approach  
506 to assess the deterioration state of aged papers. *Cellulose* **13**, 421–428.

507

508 Herculano, P.N., Lima, D.M.M., Fernandes, M.J.S., Neves, R.P., Souza-Motta, C.M. and Porto,  
509 A.L.F. (2011) Isolation of cellulolytic fungi from waste of castor (*Ricinus communis* L.). *Curr*  
510 *Microbiol* **62**, 1416–1422.

511

512 Itävaara, M., Siika-aho, M. and Viikari, L. (1999) Enzymatic degradation of cellulose-based  
513 materials. *J Polym Environ* **7**, 67–73.

514

515 Jaén García, L.F. (2019) José Luis Coto Conde y la transformación del Archivo Nacional de Costa  
516 Rica. *Revista del Archivo Nacional de Costa Rica* **83**, 54–72.

517

518 Jeong, M.J., Kang, K.Y., Bacher, M., Kim, H.J., Jo, B.M. and Potthast, A. (2014) Deterioration of  
519 ancient cellulose paper, Hanji: evaluation of paper permanence. *Cellulose*, **21**, 4621–4632.

520

521 Jia, Y., Yin, L., Zhang, F., Wang, M., Sun, M., Hu, C., Liu, Z., Chen, Y., Lui, J. and Pan, J. (2020)  
522 Fungal community analysis and biodeterioration of waterlogged wooden lacquerware from the  
523 Nanhai no. 1 shipwreck. *Appl Sci* **10**, e3797.

524

525 Johnsen, H.R. and Krause, K. (2014) Cellulase activity screening using pure  
526 carboxymethylcellulose: Application to soluble cellulolytic samples and to plant tissue prints. *Int*  
527 *J Mol Sci* **15**, 830–838.

528

529 Kasana, R.C., Salwan, R., Dhar, H., Dutt, S. and Gulati, A. (2008) A rapid and easy method for  
530 the detection of microbial cellulases on agar plates using Gram's iodine. *Curr Microbiol* **57**, 503–  
531 507.

532

533 Kepler, R., Ban, S., Nakagiri, A., Bischoff, J., Hywel-Jones, N., Owensby, C.A. and Spatafora,  
534 J.W. (2013) The phylogenetic placement of hypocrealean insect pathogens in the genus  
535 *Polycephalomyces*: An application of One Fungus One Name. *Fungal Biol* **117**, 611–622.

536

537 Koh, S., Mizuno, M., Izuoka, Y., Fujino, N., Hamada-Sato, N. and Amano, Y. (2021) Xylanase  
538 from marine filamentous fungus *Pestalotiopsis* sp. AN-7 was activated with diluted salt solution  
539 like brackish water. *J Appl Glycosci*, **68**, 11–18.

540

541 Ling, Z., Wang, T., Makarem, M., Cheng, H.N., Kang, X., Bacher, M., Potthast, A., Rosenau, T.,  
542 King, H., Delhom. C.D., Nam, S., Edwards, J.V., Kim, S.H., Xu, F. and French, A.D. (2019)  
543 Effects of ball milling on the structure of cotton cellulose. *Cellulose* **26**, 305–328

544

545 Lodhi, M.A., Ye, G.N., Weeden, N.F. and Reisch, B.I. (1994) A simple and efficient method for  
546 DNA extraction from grapevine cultivars and *Vitis* species. *Plant Mol Biol Rep* **12**, 6-13.

547

548 Mazzoli, R., Giuffrida, M.G. and Pessione, E. (2018) Back to the past: “find the guilty bug—  
549 microorganisms involved in the biodeterioration of archeological and historical artifacts”. *Appl*  
550 *Microbiol Biotechnol* **102**, 6393–6407.

551

552 Mesquita, N., Portugal, A., Videira, S., Rodríguez-Echeverría, S., Bandeira, A.M.L., Santos,  
553 M.J.A. and Freitas, H. (2009) Fungal diversity in ancient documents. A case study on the Archive  
554 of the University of Coimbra. *Int Biodeterior Biodegradation* **63**, 626-629.

555

556 Mwamburi, L.A. (2021) Endophytic fungi, *Beauveria bassiana* and *Metarhizium anisopliae*,  
557 confer control of the fall armyworm, *Spodoptera frugiperda* (J. E. Smith) (Lepidoptera:  
558 Noctuidae), in two tomato varieties. *Egypt J Biol Pest Control* **31**, e7.

559

560 Negi, A. and Sarethy, I. P. (2019) Microbial biodeterioration of cultural heritage: events,  
561 colonization, and analyses. *Microb Ecol* **78**, 1014–1029.

562

563 Negulescu, I., Hyojung, K., Collier, B.J. Collier, J.R. and Pends, A. (1998) Recycling cotton from  
564 cotton/ polyester fabrics. *Text Chem Color* **30**, 31–35.

565

566 O'Donnell, K. and Cigel'nik, E. (1997) Two divergent intragenomic rDNA ITS2 types within a  
567 monophyletic lineage of the Fungus *Fusarium* are nonorthologous. *Mol Phylogenetics Evol* **7**, 103-  
568 116.

569

570 Palla, F., Barresi, G. (2017) Biotechnology and conservation of cultural heritage. Springer, Cham.

571 Pinheiro, A.C., Sequeira, S.O. and Macedo, M.F. (2019) Fungi in archives, libraries, and museums:  
572 a review on paper conservation and human health. *Crit Rev Microbiol* **45**, 686–700.

573

574 Ponizovskaya, V.B., Rebrikova, N.L., Kachalkin, A.V., Antropova, A.B., Bilanenko, E.N. and  
575 Mokeeva, V.L. (2019) Micromycetes as colonizers of mineral building materials in historic  
576 monuments and museums. *Fungal Biol* **123**, 290–306.

577

578 Posada, F. and Vega, F.E. (2006) Inoculation and colonization of coffee seedlings (*Coffea arabica*  
579 L.) with the fungal entomopathogen *Beauveria bassiana* (Ascomycota: Hypocreales).  
580 *Mycoscience* **47**, 284–289.

581

582 Povolotckaia, A.V., Pankin, D.V., Sazanova, K.V., Petrov, Y.V., Kurganov, N.S., Mikhailova, A.  
583 A., Povolotckiy, A.V., Kurochkin, A.V., Vlasov, A.D., Gonobobleva, S.L., Galushkin, A.A. and  
584 Hosid, E.G. (2019) Biodamage to paper by micromycetes under experimental conditions: a study  
585 by vibrational spectroscopy methods. *Opt Spectrosc* **126**, 354–359.

586

587 Proniewicz, L.M., Paluszkiewicz, C., Wesełucha-Birczyńska, A., Majcherczyk, H., Barański, A.  
588 and Konieczna, A. (2001) FT-IR and FT-Raman study of hydrothermally degraded cellulose. *J*  
589 *Mol Struct* **596**, 163–169.

590

591 Puškárová, A., Bučková, M., Habalová, B., Kraková, L., Maková, A. and Pangallo, D. (2016)  
592 Microbial communities affecting albumen photography heritage: a methodological survey. *Sci Rep*  
593 **6**, e20810.

594



- 595 Pyzik, A., Ciuchcinski, K., Dziurzynski, M. and Dziewit, L. (2021) The bad and the good-  
596 microorganisms in cultural heritage environments-an update on biodeterioration and biotreatment  
597 approaches. *Materials* **14**, 1–15.
- 598
- 599 Rambaut, A. (2010) FigTree v1.3.1. Institute of Evolutionary Biology, University of Edinburgh,  
600 Edinburgh. <http://tree.bio.ed.ac.uk/software/figtree/>
- 601
- 602 Ranalli, G. and Zanardini E. (2021) Biocleaning on cultural heritage: new frontiers of microbial  
603 biotechnologies. *J. Appl. Microbiol* **131**, 583-603.
- 604
- 605 Ranalli, G., Alfano, G., Belli, C., Lustrato, G., Colombini, M.P., Bonaduce, I., Zanardini, E.,  
606 Abbruscato, P., Cappitelli, F., Sorlini, C. (2005) Biotechnology applied to cultural heritage:  
607 biorestitution of frescoes using viable bacterial cells and enzymes. *J. Appl. Microbiol* **98**, 73-83.
- 608
- 609 Reddy, M.S., Murali, T.S., Suryanarayanan, T.S., Govinda Rajulu, M.B. and Thirunavukkarasu,  
610 N. (2016) *Pestalotiopsis* species occur as generalist endophytes in trees of Western Ghats forests  
611 of southern India. *Fungal Ecol* **24**, 70–75.
- 612
- 613 Rodríguez-Rodríguez, C. E., Jesús García-Galán, M., Blánquez, P., Díaz-Cruz, M. S., Barceló, D.,  
614 Caminal, G., and Vicent, T. (2012) Continuous degradation of a mixture of sulfonamides by  
615 *Trametes versicolor* and identification of metabolites from sulfapyridine and sulfathiazole. *J*  
616 *Hazard Mater* **213–214**, 347–354.
- 617
- 618 Romero, S.M., Giudicessi, S.L. and Vitale, R.G. (2021) Is the fungus *Aspergillus* a threat to  
619 cultural heritage? *J Cult Her* **51**, 107–124.
- 620
- 621 Sanjuan, T., Tabima, J., Restrepo, S., Læssøe, T., Spatafora, J.W. and Franco-Molano, A.E. (2014)  
622 Entomopathogens of Amazonian stick insects and locusts are members of the *Beauveria* species  
623 complex (*Cordyceps sensu stricto*). *Mycologia* **106**, 260–275.
- 624

- 625 Sequeira, S.O., De Carvalho, H.P., Mesquita, N., Portugal, A. and Macedo, M.F. (2019) Fungal  
626 stains on paper: Is what you see what you get? *Conservar Património* **32**, 18–27.  
627
- 628 Shrestha, B., Kubátová, A., Tanaka, E., Oh, J., Yoon, D.H., Sung, J.M. and Sung, G.H. (2019)  
629 Spider-pathogenic fungi within Hypocreales (Ascomycota): their current nomenclature, diversity,  
630 and distribution. *Mycol Prog* **18**, 983–1003.  
631
- 632 Silva, A.G. (2011) The difficulty for conserving cultural heritage in tropical countries: the  
633 experience of Rio de Janeiro City. *Int Preserv News* **54**, 40–43.  
634
- 635 Sterflinger, K. and Pinzari, F. (2012) The revenge of time: Fungal deterioration of cultural heritage  
636 with particular reference to books, paper and parchment. *Environ Microbiol* **14**, 559–566.  
637
- 638 Šuchová, K., Puchart, V., Spodsberg, N., Mørkeberg Krogh, K. B. R. and Biely, P. (2020) A novel  
639 GH30 xylobiohydrolase from *Acremonium alcalophilum* releasing xylobiose from the non-  
640 reducing end. *Enzyme Microb Technol* **134**, e109484.  
641
- 642 Trovão, J. and Portugal, A. (2021) Current knowledge on the fungal degradation abilities profiled  
643 through biodeteriorative plate essays. *Appl Sci* **11**, e4196.  
644
- 645 Vahur, S., Teearu, A., Peets, P., Joosu, L. and Leito, I. (2016) ATR-FT-IR spectral collection of  
646 conservation materials in the extended region of 4000-80 cm<sup>-1</sup>. *Anal Bioanal Chem* **408**, 3373–  
647 3379.  
648
- 649 Valášková, V. and Baldrian, P. (2006). Estimation of bound and free fractions of lignocellulose-  
650 degrading enzymes of wood-rotting fungi *Pleurotus ostreatus*, *Trametes versicolor* and  
651 *Piptoporus betulinus*. *Res Microbiol* **157**, 119–124.  
652
- 653 Vieto, S., Escudero-Leyva, E., Avendaño, R., Rechnitzer, N., Barrantes-Madrigal, M.D., Conejo-  
654 Barboza, G., Herrera-Sancho, O. A., Chaverri, P. and Chavarría, M. (2022) Biodeterioration and

655 cellulolytic activity by fungi isolated from a nineteenth-century painting at the National Theatre  
656 of Costa Rica. *Fungal Biol* **126**, 101–112.

657

658 Watanabe, M., Inoue, H., Inoue, B., Yoshimi, M., Fujii, T. and Ishikawa, K. (2014) Xylanase  
659 (GH11) from *Acremonium cellulolyticus*: Homologous expression and characterization. *AMB*  
660 *Express* **4**, 1–8.

661

662 White, T.J., Bruns, T., Lee, S. and Taylor, J. (1990) Amplification and direct sequencing of fungal  
663 ribosomal RNA genes for phylogenetics, PCR Protocols. Academic Press, Inc.

664

665 Zhao, J., Shi, P., Huang, H., Li, Z., Yuan, T., Yang, P., Luo, H., Bai, Y., Yao, B. (2012) A novel  
666 thermoacidophilic and thermostable endo- $\beta$ -1,4-glucanase from *Phialophora* sp. G5: Its  
667 thermostability influenced by a distinct  $\beta$ -sheet and the carbohydrate-binding module. *Appl*  
668 *Microbiol Biotechnol* **95**, 947–955.

669

670 Zhao, J., Shi, P., Luo, H., Yang, P., Zhao, H., Bai, Y., Huang, H., Wang, H. and Yao, B. (2010)  
671 An acidophilic and acid-stable  $\beta$ -mannanase from *Phialophora* sp. P13 with high mannan  
672 hydrolysis activity under simulated gastric conditions. *J Agric Food Chem* **58**, 3184–3190.

673

674

675

676

677

678

679

680

681

682

683 **Tables**

684

685 **Table 1. Chemical, substrate, and ink characterization of the historic documents from Costa**

686 **Rica.**

| <b>Document</b>                                  | <b>Sections analyzed for chemical characterization</b> | <b>Sections analyzed for fungal isolation</b> | <b>Paper composition</b>    | <b>Ink chemical elements detected</b>     |
|--------------------------------------------------|--------------------------------------------------------|-----------------------------------------------|-----------------------------|-------------------------------------------|
| Independence Act, 1821                           | Pages 1-3                                              | Pages 1-3                                     | Cotton                      | Fe, Ca, Zn, K                             |
| Cloudy Days Act, 1821                            | Page 1<br>Page 2                                       | Full document                                 | Cotton<br>Cellulose acetate | Fe, Ca, Zn, K, S,<br>Cl, Pb<br>Fe, Ca, Zn |
| Political Constitution, 1949 (1991 reproduction) | Full document                                          | Cover and Slavery Abolition page              | Wood cellulose              | Not determined                            |
| Guatemalan Series 1539                           | Full document                                          | Pages 1,8,3,17                                | Cotton                      | Not determined                            |
| Guatemalan Series 1549                           | Full document                                          | Pages 2,5,9,10                                | Cotton                      | Not determined                            |

687

688

689 **Table 2.** Identification (ID); BLAST results using ITS, TEF1 and TUB2; and origin of documents. Names in bold indicate the  
690 assigned classification.  
691

| Isolate number | Origin                                                 | Closest match and accession number / % similarity *             |                                                           |                                                                   |
|----------------|--------------------------------------------------------|-----------------------------------------------------------------|-----------------------------------------------------------|-------------------------------------------------------------------|
|                |                                                        | ID with ITS                                                     | ID with TEF1                                              | ID with TUB2                                                      |
| 1539-A1P       | Guatemalan series, 1539                                | <b><i>Purpureocillium lilacinum</i></b><br>MZ359582 / 99.3      | <b><i>Purpureocillium lilacinum</i></b><br>MH613753 / 100 | <b><i>Purpureocillium lilacinum</i></b><br>JQ965112 / 99.8        |
| 1549-1A1P      | Guatemalan series, 1549                                | <b><i>Penicillium</i> sp.</b> FJ752622 /<br>99.81               | -                                                         | <b><i>Penicillium compactum</i></b><br>KM973202 / 98.6            |
| 1549-4A1C      |                                                        | <b>Unidentified<br/>Herpotrichiellaceae</b><br>KJ612089 / 90.48 | no match                                                  | no match                                                          |
| AI1-A1C        | Independence Act, 1821                                 | <b><i>Cladosporium</i> sp.</b><br>OK274323 / 100                | -                                                         | <b><i>Cladosporium oxysporum</i></b><br>EF101455 / 95.5           |
| AI3-A1P        |                                                        | <b><i>Aspergillus hiratsukae</i></b><br>MN347034 / 100          | -                                                         | <b><i>Aspergillus hiratsukae</i></b><br>MH644026 / 100            |
| CP1-A1C        | Political Constitution,<br>1949 (1991<br>reproduction) | <b><i>Periconia</i> sp.</b> KP128003 /<br>99.80                 | no match                                                  | no match                                                          |
| CP1-A1P        |                                                        | <b><i>Cladosporium</i> sp.</b><br>OK274323 / 92.48              | -                                                         | <b><i>Cladosporium</i> sp.</b><br>JQ217373 / 97                   |
| CP1-A2C        |                                                        | <b><i>Pestalotiopsis microspora</i></b><br>OK254042 / 100       | -                                                         | <b><i>Neopestalotiopsis<br/>clavispora</i></b> OM328818 /<br>98.2 |
| CP1-A2P        |                                                        | <b><i>Cladosporium</i> sp.</b><br>EF504401 / 100                | -                                                         | -                                                                 |
| CP1-A3C        |                                                        | <b><i>Trametes hirsuta</i></b><br>GQ280373 / 100                | -                                                         | -                                                                 |
| CP1-A3P        |                                                        | <b>Unidentified<br/>Psathyrellaceae</b> JQ922137<br>/ 100       | -                                                         | no match                                                          |
| CP2-A1C        |                                                        | <b>Unidentified Pleosporales</b><br>KP263091 / 92.42            | -                                                         | <b><i>Biatrispora</i> sp.</b> MF588919<br>/ 86                    |

|         |                                           |                                                                 |                                                |                                                           |
|---------|-------------------------------------------|-----------------------------------------------------------------|------------------------------------------------|-----------------------------------------------------------|
| CP2-A1P |                                           | <i>Purpureocillium lilacinum</i><br>MZ359582 / 99.88            | -                                              | <i>Purpureocillium lilacinum</i><br>GU968702 / 100%       |
| CP2-A2C |                                           | <i>Pestalotiopsis trachycarpicola</i> MZ453106 / 99.82          | <i>Neopestalotiopsis</i> sp.<br>KR493607 / 100 | <i>Pestalotiopsis kenyana</i><br>KX895360 / 100           |
| CP2-A2P |                                           | <i>Coprinellus</i> sp. MK307658 / 99.84                         | -                                              | -                                                         |
| CP2-A3C |                                           | <i>Acremonium persicinum</i><br>JQ599382 / 99.42                | -                                              | -                                                         |
| CP2-A3P |                                           | <i>Beauveria</i> aff. <i>bassiana</i><br>MZ618707 / 100         | -                                              | <i>Xenoacremonium recifei</i><br>KM232105 / 89            |
| CP2-A4C |                                           | <i>Acremonium persicinum</i><br>JQ599382 / 100                  | -                                              | -                                                         |
| CP2-A4P |                                           | <i>Cyphellophora</i> aff. <i>pluriseptata</i> MH063042.1 / 91.7 | -                                              | <i>Cyphellophora</i> sp.<br>LR814116 / 80%                |
| CP2-A5C |                                           | <i>Penicillium</i> aff. <i>sumatraense</i> MH864547 / 100       | -                                              | -                                                         |
| ND1-A1P |                                           | Cloudy Days Act, 1821                                           | <i>Penicillium steckii</i><br>MZ568311 / 100   | -                                                         |
| ND2-A1P | <i>Cladosporium</i> sp.<br>OK242741 / 100 |                                                                 | -                                              | <i>Cladosporium</i> aff. <i>oxysporum</i> KU216745 / 99.7 |

\*If the percent identity is less than 80% and query coverage less than 50%, then the result is indicated as “no match.”

692  
693

694 **Table 3.** Enzymatic index (EI) registered by fungal isolates ( $\pm$  indicates standard deviation based  
695 on three replicates).

| Isolate code | Taxonomy                                      | Enzymatic Index (EI) |
|--------------|-----------------------------------------------|----------------------|
| CP2-A4P      | <i>Cyphellophora</i> aff. <i>pluriseptata</i> | 4.0 $\pm$ 0.3        |
| ND1-A1P      | <i>Penicillium steckii</i>                    | 3.3 $\pm$ 0.3        |
| CP1-A2P      | <i>Cladosporium</i> sp.                       | 3.3 $\pm$ 0.1        |
| CP2-A1P      | <i>Purpureocillium lilacinum</i>              | 3.2 $\pm$ 0.0        |
| 1549-4A1C    | Herpotrichiellaceae                           | 3.1 $\pm$ 0.4        |
| CP2-A2C      | <i>Pestalotiopsis kenyana</i>                 | 3.1 $\pm$ 0.5        |
| CP2-A3P      | <i>Beauveria</i> aff. <i>bassiana</i>         | 3.1 $\pm$ 0.3        |
| CP1-A1P      | <i>Cladosporium</i> sp.                       | 3.0 $\pm$ 0.1        |
| CP2-A5C      | <i>Penicillium</i> aff. <i>sumatraense</i>    | 2.9 $\pm$ 0.7        |
| CP2-A1C      | Pleosporales                                  | 2.8 $\pm$ 0.2        |
| A13-A1P      | <i>Aspergillus hiratsukae</i>                 | 2.8 $\pm$ 0.0        |
| 1549-1A1P    | <i>Penicillium compactum</i>                  | 2.6 $\pm$ 0.9        |
| A11-A1C      | <i>Cladosporium</i> sp.                       | 2.6 $\pm$ 0.1        |
| CP1-A1C      | <i>Periconia</i> sp.                          | 2.5 $\pm$ 0.3        |
| ND2-A1P      | <i>Cladosporium</i> aff. <i>oxysporum</i>     | 2.5 $\pm$ 0.2        |
| CP1-A3P      | Psathyrellaceae                               | 2.2 $\pm$ 0.2        |
| CP2-A2P      | <i>Coprinellus</i> sp.                        | 2.0 $\pm$ 0.3        |
| CP2-A4C      | <i>Acremonium persicinum</i>                  | 1.8 $\pm$ 0.1        |
| CP1-A2C      | <i>Neopestalotiopsis clavispora</i>           | 1.7 $\pm$ 0.1        |
| CP2-A3C      | <i>Acremonium persicinum</i>                  | 1.6 $\pm$ 0.2        |
| Control      | <i>Pleurotus ostreatus</i>                    | 1.3 $\pm$ 0.1        |
| CP1-A3C      | <i>Trametes hirsuta</i>                       | 1.1 $\pm$ 0.0        |
| 1539-A1P     | <i>Purpureocillium lilacinum</i>              | 0                    |

### Figure captions

**Figure 1.** Historic documents from Costa Rica analyzed for chemical and substrate characterization. **A,B.** Independence Act. **C.** Signs of deterioration on the Independence Act, including yellow spots around the letters. **D.** Cloudy Days Act. **E.** Humidity mark on Cloudy Days Act. **F.** Oxidation signs around the ink from Cloudy Days Act. **G.** 1949 Political Constitution

(1991 reproduction). **H.** Signs of microbiological contamination on 1949 Political Constitution (1991 reproduction). **I.** Yellow spots on 1949 Political Constitution (1991 reproduction). **J.** Fragment of the 1539 Guatemalan Series. **K.** Fragment of the 1549 Guatemalan Series. **L,M.** Signs of leakage and humidity on 1539-1549 Guatemalan Series.

**Figure 2.** Bayesian Inference consensus cladogram based on nrDNA ITS sequences. Posterior probabilities are indicated at branches. LnL = -13564.21



Independence Letter  
1821

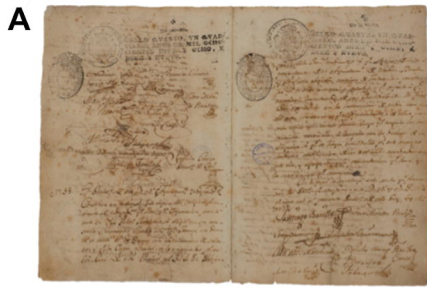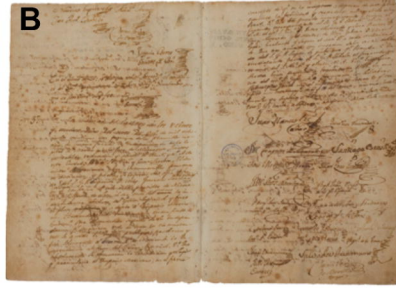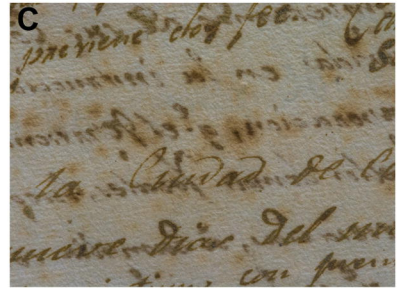

Cloudy Days Letter  
1821

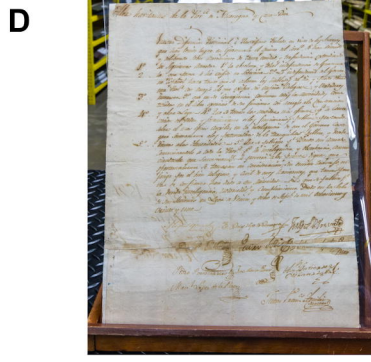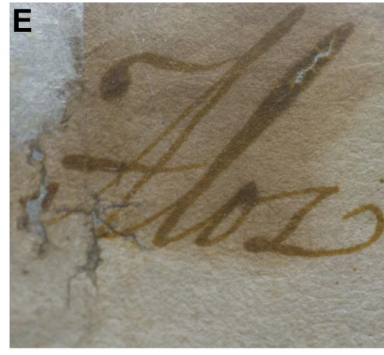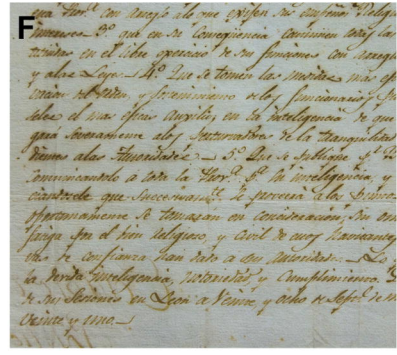

Political Constitution  
1991 reproduction

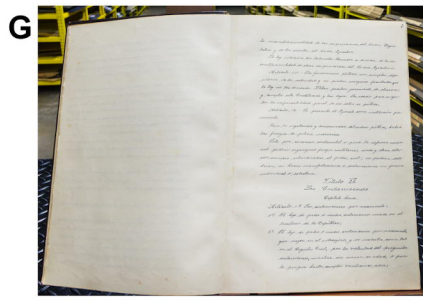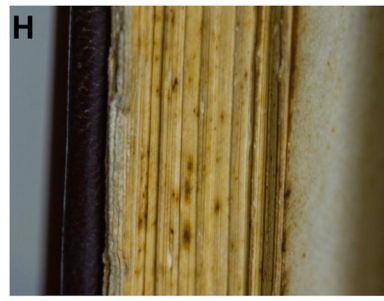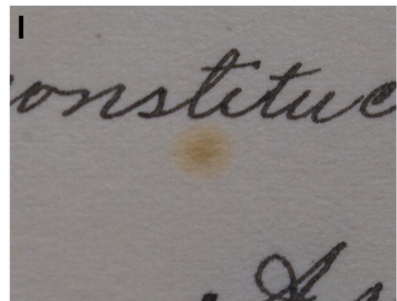

Guatemalan Series  
1539 and 1549

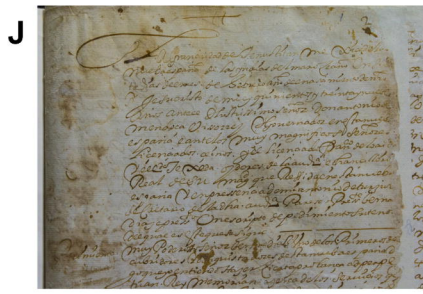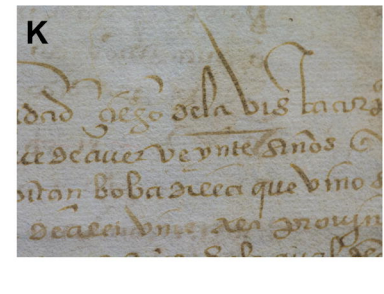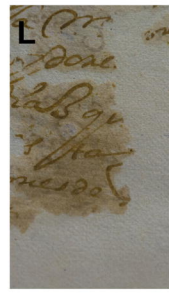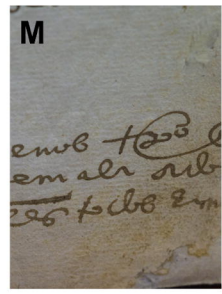

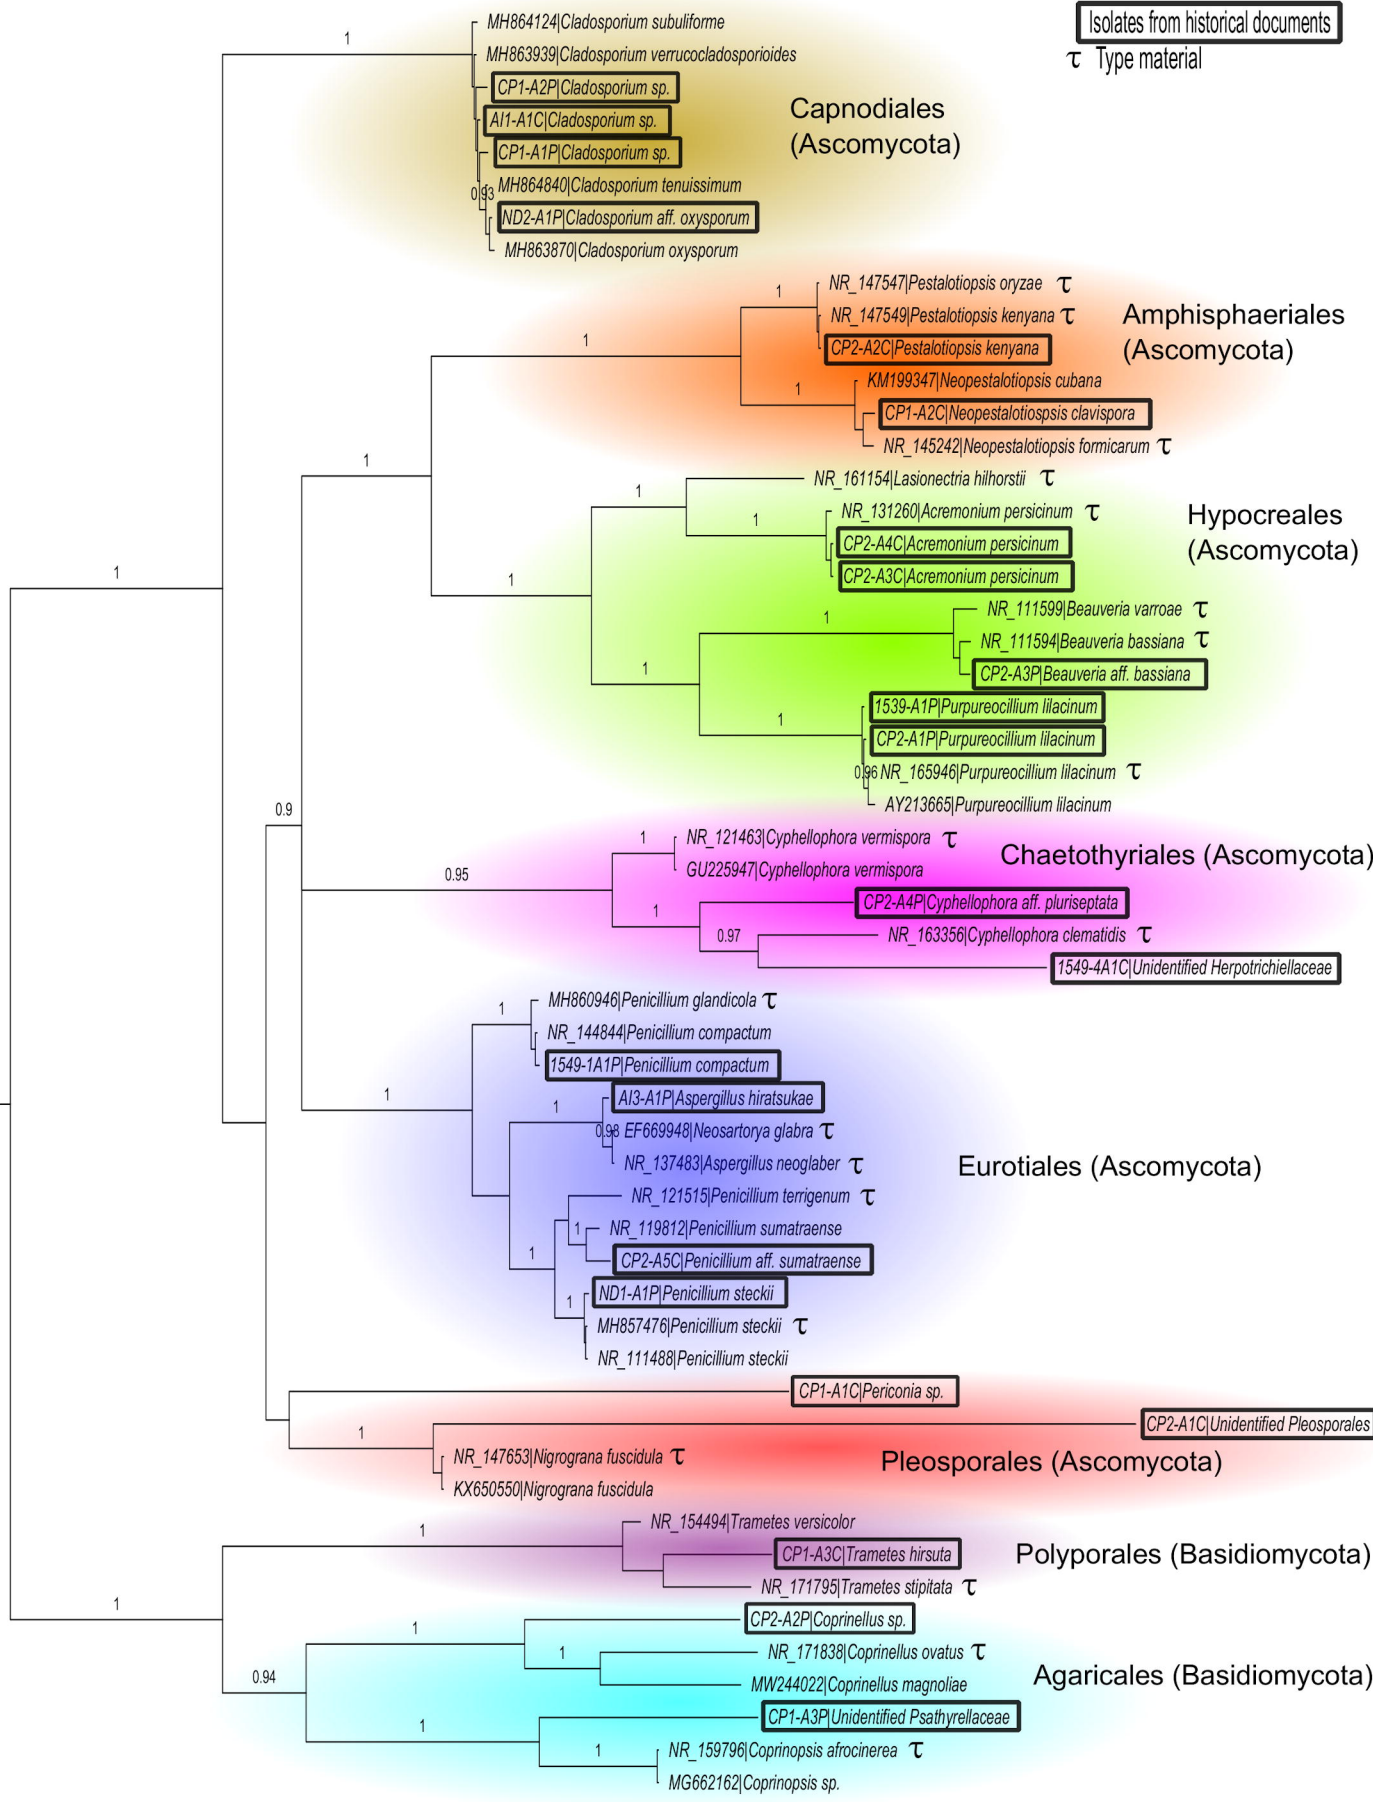

Isolates from historical documents

$\tau$  Type material

Capnodiales (Ascomycota)

Amphispheariales (Ascomycota)

Hypocreales (Ascomycota)

Chaetothyriales (Ascomycota)

Eurotiales (Ascomycota)

Pleosporales (Ascomycota)

Polyporales (Basidiomycota)

Agaricales (Basidiomycota)

0.09
